# Supplementary material for: Switching and charging of a ruthenium dye on Ag(111)
Source: Royal Society of Chemistry journal article supplement (doi:10.1039/c3cp51023a), 2013-01-01
Supplement: c3cp51023a.pdf [file c3cp51023a.pdf]

# Switching and charging of a ruthenium dye on Ag(111) – Supplemental material

Nadine Hauptmann,<sup>a</sup> Christian Hamann,<sup>a</sup> Hao Tang,<sup>b</sup> and Richard Berndt<sup>\*a</sup>

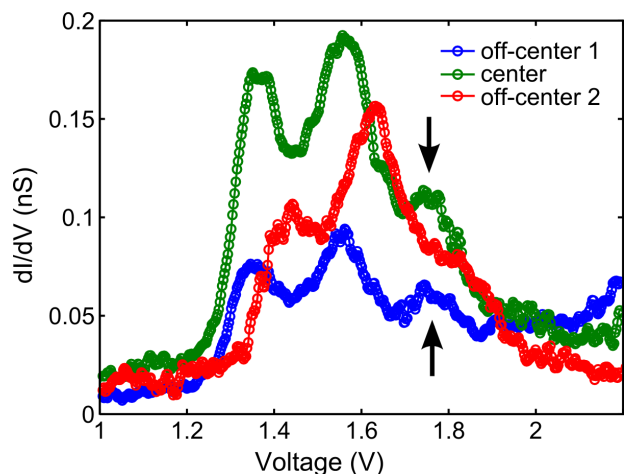

**Fig. S1** Differential conductance  $dI/dV$  vs. voltage on an unswitched N3 (Figs. 2(a) and (b)). The data was recorded at the center of the molecules (green) and at two off-center positions (red and blue). A third vibronic peak can be observed (arrow).

## Calculation of $E_0$ and $\alpha$

The energy level  $E_0$  and the fraction  $\alpha$  are calculated from the onsets of  $P^-$  at  $V^-$  and  $P^+$  at  $V^+$  as:  $E_0/e = -V^- \left( \frac{V^+}{V^+ - V^-} \right)$  and  $\alpha = \frac{V^-}{V^+ - V^-}$ . With the values from Fig. 3(a) ( $V^- = -2.2$  V and  $V^+ = 0.47$  V)  $E_0 = 0.39$  V and  $\alpha = 0.18$  are obtained.

<sup>a</sup> Institut für Experimentelle und Angewandte Physik, Christian-Albrechts-Universität zu Kiel, 24098 Kiel, Germany; [hauptmann@physik.uni-kiel.de](mailto:hauptmann@physik.uni-kiel.de)

<sup>b</sup> CEMES/CNRS 29, rue Jeanne Marvig, B.P. 94347, 31055 Toulouse Cedex, France; Université de Toulouse, UPS, 31055 Toulouse, France

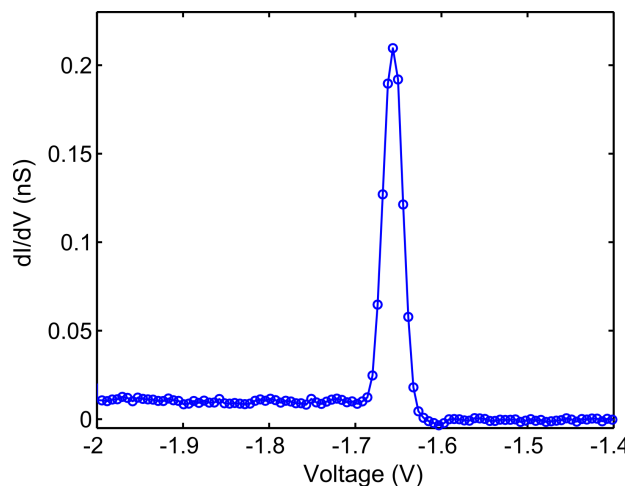

**Fig. S2** Differential conductance  $dI/dV$  vs. voltage of the molecule on which the  $dI/dV$  map in Fig. 3(a) was performed. For this molecule we find  $E_0 \sim 240$  mV from the measured onsets  $V^- = -1.62$  V and  $V^+ = 0.28$  V. The tip-molecule distance is defined by a current of 51 pA and a voltage of  $-2$  V.

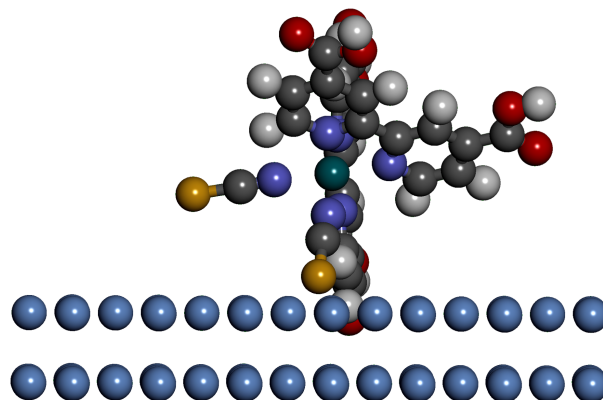

**Fig. S3** Suggested adsorption geometry of N3 at a single step after the switching as viewed from the upper terraces. The step is parallel to the plane of the paper.
